# Supplementary material for: Evaluation of MicroScan Bacterial Identification Panels for Low-Resource Settings
Source: PubMed Central journal article supplement (PMC7922174; doi:10.3390/diagnostics11020349), 2021-02-19
Supplement: diagnostics-11-00349-s001.pdf [file diagnostics-11-00349-s001.pdf]

**Table S1.** Lot numbers of tested panels.

|                      | Lot number | Expiry date | Period used                                       |
|----------------------|------------|-------------|---------------------------------------------------|
| Gram-positive panels | 2019-04-24 | 24/4/2019   | 15/04/2019 – 19/04/2019                           |
|                      | 2019-12-27 | 27/12/2019  | 22/04/2019 – 03/05/2019<br>16/10/2019 – 6/12/2019 |
|                      | 2020-07-02 | 2/7/2020    | 27/01/2020 – 31/01/2020                           |
| Gram-negative panels | 2019-04-26 | 26/4/2019   | 11/03/2019 – 19/04/2019                           |
|                      | 2019-11-30 | 30/11/2019  | 22/04/2019 – 03/05/2019                           |
|                      | 2019-12-17 | 17/12/2019  | 16/10/2019 – 29/11/2019                           |
|                      | 2020-03-01 | 01/03/2020  | 2/12/2019 – 6/12/2019<br>06/01/2020 – 31/01/2020  |
| MSF ID panels        | 2019-04-16 | 16/4/2019   | 18/03/2019 – 12/04/2019                           |

**Table S2.** Geographical origin of the isolates. These isolates were obtained from ITM travel clinic and surveillance studies.

| Species                             | Total number of isolates tested | Africa | Asia | South America | Europe            |                   |
|-------------------------------------|---------------------------------|--------|------|---------------|-------------------|-------------------|
|                                     |                                 |        |      |               | Clinical isolates | Reference strains |
| <b>Gram-negative species</b>        |                                 |        |      |               |                   |                   |
| <i>Escherichia coli</i>             | 28                              | 24     | 4    | -             | -                 | -                 |
| <i>Klebsiella pneumoniae</i>        | 13                              | 10     | 2    | 1             | -                 | -                 |
| <i>Klebsiella oxytoca</i>           | 3                               | 2      | -    | 1             | -                 | -                 |
| <i>Enterobacter cloacae</i> complex | 15                              | 12     | -    | 3             | -                 | -                 |
| <i>Citrobacter freundii</i> complex | 9                               | 8      | 1    | -             | -                 | -                 |
| <i>Kluyvera ascorbata</i>           | 1                               | 1      | -    | -             | -                 | -                 |
| <i>Salmonella</i> Typhi             | 10                              | 6      | 3    | 1             | -                 | -                 |
| <i>Salmonella</i> Paratyphi A       | 10                              | 4      | 6    | -             | -                 | -                 |
| <i>Salmonella</i> Typhimurium       | 10                              | 8      | 2    | -             | -                 | -                 |
| <i>Salmonella</i> Choleraesuis      | 9                               | -      | 8    | 1             | -                 | -                 |
| <i>Shigella</i> species             | 10                              | 4      | -    | -             | -                 | 6                 |
| <i>Morganella morganii</i>          | 4                               | 4      | -    | -             | -                 | -                 |
| <i>Proteus mirabilis</i>            | 7                               | 4      | 3    | -             | -                 | -                 |
| <i>Providencia rettgerii</i>        | 1                               | 1      | -    | -             | -                 | -                 |
| <i>Pseudomonas aeruginosa</i>       | 11                              | 6      | 3    | 2             | -                 | -                 |
| <i>Acinetobacter baumannii</i>      | 9                               | 6      | -    | 3             | -                 | -                 |
| <i>Achromobacter xylosoxidans</i>   | 10                              | 9      | 1    | -             | -                 | -                 |
| <i>Burkholderia cepacia</i>         | 15                              | 14     | -    | 1             | -                 | -                 |
| <i>Burkholderia thailandensis</i>   | 6                               | -      | 6    | -             | -                 | -                 |
| <i>Burkholderia ubonensis</i>       | 1                               | -      | 1    | -             | -                 | -                 |
| <i>Burkholderia oklahomensis</i>    | 1                               | -      | 1    | -             | -                 | -                 |
| <i>Stenotrophomonas maltophilia</i> | 15                              | 14     | 1    | -             | -                 | -                 |
| <i>Aeromonas species</i>            | 3                               | -      | 3    | -             | -                 | -                 |
| <i>Vibrio alginolyticus</i>         | 2                               | -      | -    | -             | -                 | 2                 |
| <b>Gram-positive species</b>        |                                 |        |      |               |                   |                   |
| Species                             | Total number of isolates tested | Africa | Asia | South America | Europe            |                   |
|                                     |                                 |        |      |               | Clinical isolates | Reference strains |
| <i>Staphylococcus aureus</i>        | 14                              | 10     | 4    | -             | -                 | -                 |
| <i>Staphylococcus hominis</i>       | 3                               | 1      | 2    | -             | -                 | -                 |
| <i>Staphylococcus epidermidis</i>   | 11                              | 9      | -    | -             | -                 | 2                 |
| <i>Staphylococcus lugdunensis</i>   | 3                               | 1      | -    | -             | -                 | 2                 |
| <i>Staphylococcus lentus</i>        | 1                               | -      | 1    | -             | -                 | -                 |

|                                                    |            |                    |                   |                  |                 |                  |
|----------------------------------------------------|------------|--------------------|-------------------|------------------|-----------------|------------------|
| <i>Staphylococcus haemolyticus</i>                 | 6          | 6                  | -                 | -                | -               | -                |
| <i>Listeria monocytogenes</i>                      | 2          | -                  | -                 | -                | -               | 2                |
| <i>Micrococcus</i> species                         | 4          | 3                  | 1                 | -                | -               | -                |
| <i>Enterococcus faecalis</i>                       | 7          | 7                  | -                 | -                | -               | -                |
| <i>Enterococcus faecium</i>                        | 7          | 5                  | 1                 | 1                | -               | -                |
| <i>Enterococcus casseliflavus</i>                  | 1          | -                  | 1                 | -                | -               | -                |
| <i>Streptococcus agalactiae</i>                    | 13         | 1                  | 4                 | -                | 2               | 6                |
| <i>Streptococcus anginosus</i>                     | 8          | 1                  | 2                 | -                | 2               | 3                |
| <i>Streptococcus pneumoniae</i>                    | 12         | 10                 | -                 | -                | 2               | -                |
| <i>Streptococcus gallolyticus</i> *                | 10         | 1                  | 6                 | -                | -               | 3                |
| <i>Streptococcus lutetiensis</i> *                 | 1          | -                  | 1                 | -                | -               | -                |
| <i>Streptococcus pyogenes</i>                      | 13         | 5                  | 4                 | -                | 1               | 3                |
| <i>Streptococcus dysgalactiae</i><br>(group C & G) | 6          | -                  | 3                 | -                | -               | 3                |
| <i>Streptococcus mitis/oralis</i>                  | 5          | 4                  | 1                 | -                | -               | -                |
| <i>Streptococcus salivarius</i>                    | 1          | -                  | 1                 | -                | -               | -                |
| <i>Bacillus</i> species                            | 10         | 10                 | -                 | -                | -               | -                |
| <i>Corynebacterium</i> species                     | 6          | 2                  | 1                 | -                | -               | 3                |
| Yeast species                                      | 9          | 9                  | -                 | -                | -               | -                |
| <i>Streptococcus suis</i>                          | 11         | -                  | 11                | -                | -               | -                |
| <b>Total</b>                                       | <b>367</b> | <b>222 (60.5%)</b> | <b>89 (24.3%)</b> | <b>14 (3.8%)</b> | <b>7 (1.9%)</b> | <b>35 (9.5%)</b> |

\* Formerly part of *Streptococcus bovis* group

Table S3. Detailed results for incorrect use of panels. Species not listed in the database are marked with an asterisk (\*).

| Species                                                        | Total number of isolates tested | Identification not possible | Incorrect low probability identifications | Incorrect high probability identifications |
|----------------------------------------------------------------|---------------------------------|-----------------------------|-------------------------------------------|--------------------------------------------|
| <b>Gram-positive isolates on Gram-negative panel</b>           |                                 |                             |                                           |                                            |
| <i>S. aureus</i>                                               | 5                               | -                           | 3                                         | 2                                          |
| <i>S. hominis</i>                                              | 3                               | 1                           | 2                                         | -                                          |
| <i>S. epidermidis</i>                                          | 2                               | -                           | 2                                         | -                                          |
| <i>S. lentus</i>                                               | 1                               | -                           | -                                         | 1                                          |
| <i>S. haemolyticus</i>                                         | 1                               | -                           | 1                                         | -                                          |
| <i>Micrococcus</i> species                                     | 4                               | -                           | 3                                         | 1                                          |
| <i>Enterococcus</i> species                                    | 10                              | 6                           | 1                                         | 3                                          |
| <i>S. agalactiae</i>                                           | 6                               | 2                           | -                                         | 4                                          |
| <i>S. anginosus</i>                                            | 1                               | -                           | 1                                         | -                                          |
| <i>S. pneumoniae</i>                                           | 3                               | -                           | 2                                         | 1                                          |
| <i>S. pyogenes</i>                                             | 4                               | 3                           | 1                                         | -                                          |
| <i>S. dysgalactiae</i>                                         | 4                               | 1                           | 1                                         | 2                                          |
| <i>S. oralis/mitis</i>                                         | 4                               | -                           | 2                                         | 2                                          |
| <i>S. suis</i>                                                 | 10                              | 1                           | -                                         | 9                                          |
| <i>Bacillus</i> species *                                      | 8                               | 2                           | 3                                         | 3                                          |
| <i>Corynebacterium</i> species *                               | 3                               | -                           | 1                                         | 2                                          |
| Yeast species *                                                | 5                               | -                           | 5                                         | -                                          |
| <b>Staphylococcus interpreted with Streptococcus algorithm</b> |                                 |                             |                                           |                                            |
| <i>S. aureus</i>                                               | 14                              | 8                           | -                                         | 6                                          |
| <i>S. hominis</i>                                              | 3                               | 2                           | -                                         | 1                                          |
| <i>S. epidermidis</i>                                          | 11                              | 9                           | 2                                         | -                                          |
| <i>S. lugdunensis</i>                                          | 3                               | 3                           | -                                         | -                                          |
| <i>S. lentus</i>                                               | 1                               | -                           | -                                         | 1                                          |
| <i>S. haemolyticus</i>                                         | 6                               | 6                           | -                                         | -                                          |
| <i>Listeria monocytogenes</i>                                  | 2                               | 2                           | -                                         | -                                          |

| <i>Micrococcus</i> species                                     | 4                               | -                           |   | 2                                         |                            | 2                                          |   |
|----------------------------------------------------------------|---------------------------------|-----------------------------|---|-------------------------------------------|----------------------------|--------------------------------------------|---|
| <b>Streptococcus interpreted with Staphylococcus algorithm</b> |                                 |                             |   |                                           |                            |                                            |   |
| <i>Enterococcus</i> species                                    | 15                              | 9                           |   | 1                                         |                            | 5                                          |   |
| Species                                                        | Total number of isolates tested | Identification not possible |   | Incorrect low probability identifications |                            | Incorrect high probability identifications |   |
| <i>S. agalactiae</i>                                           | 13                              | 3                           |   | 6                                         |                            | 4                                          |   |
| <i>S. anginosus</i>                                            | 8                               | 1                           |   | 3                                         |                            | 4                                          |   |
| <i>S. pneumoniae</i>                                           | 12                              | -                           |   | 1                                         |                            | 11                                         |   |
| <i>S. gallolyticus</i>                                         | 10                              | -                           |   | -                                         |                            | 10                                         |   |
| <i>S. lutetiensis</i>                                          | 1                               | -                           |   | 1                                         |                            | -                                          |   |
| <i>S. pyogenes</i>                                             | 13                              | 9                           |   | -                                         |                            | 4                                          |   |
| <i>S. dysgalactiae</i>                                         | 6                               | 3                           |   | -                                         |                            | 3                                          |   |
| <i>S. oralis/mitis</i>                                         | 5                               | 1                           |   | 2                                         |                            | 2                                          |   |
| <i>S. salivarius</i>                                           | 1                               | -                           |   | 1                                         |                            | -                                          |   |
| <b>Gram-negative species on Gram-positive panel</b>            |                                 |                             |   |                                           |                            |                                            |   |
|                                                                |                                 | Identification not possible |   | Incorrect low probability identifications |                            | Incorrect high probability identifications |   |
|                                                                |                                 |                             |   |                                           |                            |                                            |   |
|                                                                |                                 |                             |   |                                           | <i>Streptococcus</i>       | <i>Streptococcus</i>                       |   |
|                                                                |                                 |                             |   |                                           | Micrococcus interpretation | Micrococcus interpretation                 |   |
|                                                                |                                 |                             |   |                                           | n                          | n                                          |   |
| <i>Escherichia coli</i>                                        | 10                              | 4                           | 7 | 2                                         | -                          | 4                                          | 3 |
| <i>Enterobacter cloacae</i> complex                            | 5                               | 5                           | 5 | -                                         | -                          | -                                          | - |
| <i>Kluyvera ascorbata</i>                                      | 1                               | -                           | 1 | -                                         | -                          | 1                                          | - |
| <i>Citrobacter freundii</i> complex                            | 5                               | 4                           | 5 | 1                                         | -                          | -                                          | - |
| <i>Salmonella</i> Typhi                                        | 2                               | 2                           | 2 | -                                         | -                          | -                                          | - |
| <i>Salmonella</i> Paratyphi A                                  | 3                               | 2                           | 3 | 1                                         | -                          | -                                          | - |
| <i>Salmonella</i> Typhimurium                                  | 5                               | -                           | 5 | 5                                         | -                          | -                                          | - |
| <i>Salmonella</i> Choleraesuis                                 | 5                               | 5                           | 5 | -                                         | -                          | -                                          | - |
| <i>Shigella</i> species                                        | 5                               | 5                           | 5 | -                                         | -                          | -                                          | - |
| <i>Pseudomonas aeruginosa</i>                                  | 3                               | 3                           | 3 | -                                         | -                          | -                                          | - |
| <i>Acinetobacter baumannii</i>                                 | 4                               | -                           | - | -                                         | 3                          | 4                                          | 1 |
| <i>Achromobacter xylosoxidans</i>                              | 1                               | 1                           | 1 | -                                         | -                          | -                                          | - |
| <i>Burkholderia cepacia</i>                                    | 4                               | 2                           | 1 | 2                                         | -                          | -                                          | 3 |
| <i>Stenotrophomonas maltophilia</i>                            | 4                               | 1                           | - | 3                                         | 1                          | -                                          | 3 |
| <i>Burkholderia thailandensis</i> *                            | 5                               | 2                           | 4 | 1                                         | -                          | 2                                          | 1 |
| <i>Burkholderia oklahomensis</i> *                             | 1                               | 1                           | 1 | -                                         | -                          | -                                          | - |
| <i>Burkholderia ubonensis</i> *                                | 1                               | -                           | - | -                                         | -                          | 1                                          | 1 |

**Table S4.** Agreement between visual and automated (autoSCAN-4) reading: two readings had species agreement if both readings resulted in the same result up to species level. Total biotype agreement indicates the same result was read for each well. A result was considered correct if it was accurate up to species level, disregarding the probability score. For species not represented in the database, correct identification was not possible, so these results were not included.

| Species | Number of isolates tested | % species agreement | % biotype agreement | % correct identification |        |
|---------|---------------------------|---------------------|---------------------|--------------------------|--------|
|         |                           |                     |                     | Automated                | Visual |

|                                                                  |            |              |              |              |              |
|------------------------------------------------------------------|------------|--------------|--------------|--------------|--------------|
| Enterobacterales                                                 | 55         | 98.2%        | 60%          | 96.4%        | 98.2%        |
| Non-fermenters (including <i>Aeromonas/Vibrio</i> species)       | 41         | 87.8%        | 58.5%        | 85.4%        | 92.7%        |
| <b>Total Gram-negative tested</b>                                | <b>96</b>  | <b>93.8%</b> | <b>59.4%</b> | <b>91.7%</b> | <b>95.8%</b> |
| <i>Staphylococcus/ Micrococcus / Listeria</i> isolates           | 23         | 91.3%        | 60.9%        | 90.5%        | 91.3%        |
| <i>Streptococcus / Enterococcus</i>                              | 41         | 87.8%        | 53.7%        | 80.5%        | 78.0%        |
| Gram-positive rods (not represented in database)                 | 9          | 77.8%        | 44.4%        | -            | -            |
| <i>Streptococcus suis</i> (not represented in database)          | 9          | 11.1%        | 0%           | -            | -            |
| <b>Total Gram-positive; only species represented in database</b> | <b>64</b>  | <b>89.1%</b> | <b>56.3%</b> | <b>82.8%</b> | <b>81.3%</b> |
| Total                                                            | 178        | 87.1%        | 54.5%        | -            | -            |
| <b>Total including only species represented in database</b>      | <b>160</b> | <b>91.9%</b> | <b>58.1%</b> | <b>87.5%</b> | <b>90.6%</b> |

**Table S5.** Results for inter-observer agreement between two independent readers who read the panels visually. Two readings had species agreement if both readings resulted in the same result up to species level. Total biotype agreement indicates the same result was read for each well. P-value for difference in accuracy between visual and automated reading was calculated using McNemar test for paired samples. The species tested for repeatability can be found in Supplementary Table 4. The abbreviations for the tests are explained in footnote.

|                                               | Number of isolates tested for inter-observer agreement | Number of isolates with categorical agreement (% of total) | Number of isolates with total biotype agreement (% of total) | Total number of wells read | Number of wells differently read by the observers | Disagreement of which wells was seen? *                              | Which well differences led to categorical disagreement? |
|-----------------------------------------------|--------------------------------------------------------|------------------------------------------------------------|--------------------------------------------------------------|----------------------------|---------------------------------------------------|----------------------------------------------------------------------|---------------------------------------------------------|
| <b>Enterobacterales</b>                       | 15                                                     | 14 (93.3%)                                                 | 8 (53.3%)                                                    | 480                        | 13                                                | ARG; K4; RAF; ARA; NIT ; CL4 ; CET; CIT ; <b>VP x 3</b> ; IND ; FD64 | CL4                                                     |
| <b>Non-fermenting Gram-negative organisms</b> | 8                                                      | 8 (100%)                                                   | 7 (87.5%)                                                    | 256                        | 1                                                 | SOR                                                                  | /                                                       |
| <i>Aeromonas caviae</i>                       | 1                                                      | 1 (100%)                                                   | 0                                                            | 32                         | 1                                                 | IND                                                                  | /                                                       |
| <i>Staphylococcus</i> species                 | 8                                                      | 8 (100%)                                                   | 4 (50.0%)                                                    | 208                        | 5                                                 | NOV x 2; <b>VP x 2</b> ; ARG                                         | /                                                       |
| <i>Streptococcus</i> species                  | 18                                                     | 18 (100%)                                                  | 14 (77.8%)                                                   | 468                        | 4                                                 | <b>VP</b> ; PHO; PRV; PYR                                            | /                                                       |
| <b>Total</b>                                  | 50                                                     | 49 (98.0%)                                                 | 33 (66.0%)                                                   | 1444                       | 24                                                |                                                                      |                                                         |

\* Abbreviations of tests: ARA = L-arabinose fermentation; ARG = arginine dehydrolase; CET = cetrimide resistance; CIT = citrate; CL4 = colistin resistance; FD64 = nitrofurantoin resistance; IND = indole; K4 = kanamycin resistance; NIT = nitrate reduction; NOV = novobiocin resistance; PHO = phosphatase; PRV = pyruvate utilization ; PYR = Pyrrolidonyl- $\beta$ -naphthylamide; RAF = raffinose fermentation ; SOR = sorbitol fermentation; VP = Voges Proskauer.
